# Supplementary material
Source: publisher figshare collection journal article supplement (https://acs.figshare.com/ndownloader/files/3927436)
Supplement: Supplementary file 1 [file 3927436]

 
data_vic1314 
  
_audit_creation_method            SHELXL-97 
_chemical_name_systematic 
; 
 ? 
; 
_chemical_name_common             ? 
_chemical_melting_point           ? 
_chemical_formula_moiety
 'C36 H30 Cl3 P2 Sb' 
_chemical_formula_sum 
 'C36 H30 Cl3 P2 Sb' 
_chemical_formula_weight          752.64 
  
loop_ 
 _atom_type_symbol 
 _atom_type_description 
 _atom_type_scat_dispersion_real 
 _atom_type_scat_dispersion_imag 
 _atom_type_scat_source 
 'C'  'C'   0.0033   0.0016 
 'International Tables Vol C Tables 4.2.6.8 and 6.1.1.4' 
 'H'  'H'   0.0000   0.0000 
 'International Tables Vol C Tables 4.2.6.8 and 6.1.1.4' 
 'P'  'P'   0.1023   0.0942 
 'International Tables Vol C Tables 4.2.6.8 and 6.1.1.4' 
 'Cl'  'Cl'   0.1484   0.1585 
 'International Tables Vol C Tables 4.2.6.8 and 6.1.1.4' 
 'Sb'  'Sb'  -0.5866   1.5461 
 'International Tables Vol C Tables 4.2.6.8 and 6.1.1.4' 
  
_symmetry_cell_setting            Monoclinic 
_symmetry_space_group_name_H-M    'I 2/a' 
_symmetry_space_group_name_Hall   '-I 2ya' 
  
loop_ 
 _symmetry_equiv_pos_as_xyz 
 'x, y, z' 
 '-x+1/2, y, -z' 
 'x+1/2, y+1/2, z+1/2' 
 '-x+1, y+1/2, -z+1/2' 
 '-x, -y, -z' 
 'x-1/2, -y, z' 
 '-x+1/2, -y+1/2, -z+1/2' 
 'x, -y+1/2, z+1/2' 
  
_cell_length_a                    15.8017(12) 
_cell_length_b                    9.5425(8) 
_cell_length_c                    22.4802(18) 
_cell_angle_alpha                 90.00 
_cell_angle_beta                  101.4987(9) 
_cell_angle_gamma                 90.00 
_cell_volume                      3321.7(5) 
_cell_formula_units_Z             4 
_cell_measurement_temperature     173(2) 
_cell_measurement_reflns_used     7118 
_cell_measurement_theta_min       2.33 
_cell_measurement_theta_max       24.82 
  
_exptl_crystal_description        prism 
_exptl_crystal_colour             yellow 
_exptl_crystal_size_max           0.39 
_exptl_crystal_size_mid           0.32 
_exptl_crystal_size_min           0.10 
_exptl_crystal_density_meas       ? 
_exptl_crystal_density_diffrn     1.505 
_exptl_crystal_density_method     'not measured' 
_exptl_crystal_F_000              1512 
_exptl_absorpt_coefficient_mu     1.193 
_exptl_absorpt_correction_type    integration 
_exptl_absorpt_correction_T_min   0.6547 
_exptl_absorpt_correction_T_max   0.8920 
_exptl_absorpt_process_details    'SADABS (Sheldrick, 2008)' 
  
_exptl_special_details 
; 
 ? 
; 
  
_diffrn_ambient_temperature       173(2) 
_diffrn_radiation_wavelength      0.71073 
_diffrn_radiation_type            MoK\a 
_diffrn_radiation_source          'fine-focus sealed tube' 
_diffrn_radiation_monochromator   graphite 
_diffrn_measurement_device_type   'Bruker APEX-II CCD' 
_diffrn_measurement_method        '\w scans' 
_diffrn_detector_area_resol_mean  ? 
_diffrn_reflns_number             14638 
_diffrn_reflns_av_R_equivalents   0.0260 
_diffrn_reflns_av_unetI/netI      0.0195 
_diffrn_reflns_limit_h_min        -20 
_diffrn_reflns_limit_h_max        20 
_diffrn_reflns_limit_k_min        -12 
_diffrn_reflns_limit_k_max        12 
_diffrn_reflns_limit_l_min        -29 
_diffrn_reflns_limit_l_max        29 
_diffrn_reflns_theta_min          1.85 
_diffrn_reflns_theta_max          27.51 
_reflns_number_total              3822 
_reflns_number_gt                 3505 
_reflns_threshold_expression      I>2\s(I) 
  
_computing_data_collection        'Bruker APEX2' 
_computing_cell_refinement        'Bruker SAINT' 
_computing_data_reduction         'Bruker SAINT' 
_computing_structure_solution     'SHELXD (Schneider & Sheldrick, 2002)' 
_computing_structure_refinement   'SHELXL-97 (Sheldrick, 2008)' 
_computing_molecular_graphics     'Bruker SHELXTL' 
_computing_publication_material   'Bruker SHELXTL' 
  
_refine_special_details 
; 
 Refinement of F^2^ against ALL reflections.  The weighted R-factor wR and 
 goodness of fit S are based on F^2^, conventional R-factors R are based 
 on F, with F set to zero for negative F^2^. The threshold expression of 
 F^2^ > 2sigma(F^2^) is used only for calculating R-factors(gt) etc. and is 
 not relevant to the choice of reflections for refinement.  R-factors based 
 on F^2^ are statistically about twice as large as those based on F, and R- 
 factors based on ALL data will be even larger. 
; 
  
_refine_ls_structure_factor_coef  Fsqd 
_refine_ls_matrix_type            full 
_refine_ls_weighting_scheme       calc 
_refine_ls_weighting_details 
 'calc w=1/[\s^2^(Fo^2^)+(0.0231P)^2^+2.4945P] where P=(Fo^2^+2Fc^2^)/3' 
_atom_sites_solution_primary      direct 
_atom_sites_solution_secondary    difmap 
_atom_sites_solution_hydrogens    geom 
_refine_ls_hydrogen_treatment     constr 
_refine_ls_extinction_method      none 
_refine_ls_extinction_coef        ? 
_refine_ls_number_reflns          3822 
_refine_ls_number_parameters      191 
_refine_ls_number_restraints      0 
_refine_ls_R_factor_all           0.0234 
_refine_ls_R_factor_gt            0.0204 
_refine_ls_wR_factor_ref          0.0507 
_refine_ls_wR_factor_gt           0.0492 
_refine_ls_goodness_of_fit_ref    1.068 
_refine_ls_restrained_S_all       1.068 
_refine_ls_shift/su_max           0.001 
_refine_ls_shift/su_mean          0.000 
  
loop_ 
 _atom_site_label 
 _atom_site_type_symbol 
 _atom_site_fract_x 
 _atom_site_fract_y 
 _atom_site_fract_z 
 _atom_site_U_iso_or_equiv 
 _atom_site_adp_type 
 _atom_site_occupancy 
 _atom_site_symmetry_multiplicity 
 _atom_site_calc_flag 
 _atom_site_refinement_flags 
 _atom_site_disorder_assembly 
 _atom_site_disorder_group 
Sb Sb 0.2500 0.161487(15) 0.0000 0.01999(5) Uani 1 2 d S . . 
Cl1 Cl 0.2500 0.41141(6) 0.0000 0.02375(11) Uani 1 2 d S . . 
Cl2 Cl 0.37382(3) 0.17255(5) -0.05777(2) 0.03387(11) Uani 1 1 d . . . 
P P 0.37786(2) 0.18226(4) 0.105129(18) 0.01816(9) Uani 1 1 d . . . 
C11 C 0.48396(10) 0.24133(17) 0.09668(7) 0.0207(3) Uani 1 1 d . . . 
C12 C 0.55470(11) 0.15412(18) 0.10275(8) 0.0281(4) Uani 1 1 d . . . 
H12 H 0.5493 0.0576 0.1116 0.034 Uiso 1 1 calc R . . 
C13 C 0.63405(11) 0.2076(2) 0.09586(9) 0.0351(4) Uani 1 1 d . . . 
H13 H 0.6827 0.1472 0.0999 0.042 Uiso 1 1 calc R . . 
C14 C 0.64263(12) 0.3473(2) 0.08330(9) 0.0332(4) Uani 1 1 d . . . 
H14 H 0.6974 0.3837 0.0798 0.040 Uiso 1 1 calc R . . 
C15 C 0.57169(12) 0.4346(2) 0.07572(10) 0.0402(5) Uani 1 1 d . . . 
H15 H 0.5772 0.5308 0.0663 0.048 Uiso 1 1 calc R . . 
C16 C 0.49238(12) 0.38138(19) 0.08192(10) 0.0357(4) Uani 1 1 d . . . 
H16 H 0.4433 0.4411 0.0760 0.043 Uiso 1 1 calc R . . 
C21 C 0.38540(9) -0.00239(17) 0.12350(7) 0.0204(3) Uani 1 1 d . . . 
C22 C 0.40096(11) -0.09580(18) 0.07897(8) 0.0270(3) Uani 1 1 d . . . 
H22 H 0.4124 -0.0609 0.0418 0.032 Uiso 1 1 calc R . . 
C23 C 0.39978(12) -0.2392(2) 0.08886(9) 0.0352(4) Uani 1 1 d . . . 
H23 H 0.4112 -0.3021 0.0587 0.042 Uiso 1 1 calc R . . 
C24 C 0.38201(12) -0.2908(2) 0.14233(10) 0.0373(4) Uani 1 1 d . . . 
H24 H 0.3811 -0.3890 0.1489 0.045 Uiso 1 1 calc R . . 
C25 C 0.36558(12) -0.1999(2) 0.18631(9) 0.0349(4) Uani 1 1 d . . . 
H25 H 0.3529 -0.2358 0.2229 0.042 Uiso 1 1 calc R . . 
C26 C 0.36750(10) -0.05610(19) 0.17736(8) 0.0269(4) Uani 1 1 d . . . 
H26 H 0.3566 0.0059 0.2080 0.032 Uiso 1 1 calc R . . 
C31 C 0.35776(10) 0.27649(17) 0.17101(7) 0.0213(3) Uani 1 1 d . . . 
C32 C 0.41795(11) 0.2752(2) 0.22563(8) 0.0347(4) Uani 1 1 d . . . 
H32 H 0.4701 0.2238 0.2288 0.042 Uiso 1 1 calc R . . 
C33 C 0.40187(13) 0.3485(2) 0.27510(9) 0.0406(5) Uani 1 1 d . . . 
H33 H 0.4422 0.3457 0.3126 0.049 Uiso 1 1 calc R . . 
C34 C 0.32661(12) 0.4263(2) 0.27005(8) 0.0348(4) Uani 1 1 d . . . 
H34 H 0.3156 0.4770 0.3041 0.042 Uiso 1 1 calc R . . 
C35 C 0.26790(11) 0.43012(19) 0.21595(8) 0.0291(4) Uani 1 1 d . . . 
H35 H 0.2170 0.4851 0.2125 0.035 Uiso 1 1 calc R . . 
C36 C 0.28251(11) 0.35430(17) 0.16642(8) 0.0241(3) Uani 1 1 d . . . 
H36 H 0.2411 0.3556 0.1294 0.029 Uiso 1 1 calc R . . 
  
loop_ 
 _atom_site_aniso_label 
 _atom_site_aniso_U_11 
 _atom_site_aniso_U_22 
 _atom_site_aniso_U_33 
 _atom_site_aniso_U_23 
 _atom_site_aniso_U_13 
 _atom_site_aniso_U_12 
Sb 0.02384(8) 0.01514(8) 0.02094(8) 0.000 0.00438(6) 0.000 
Cl1 0.0295(3) 0.0154(3) 0.0281(3) 0.000 0.0098(2) 0.000 
Cl2 0.0379(2) 0.0331(2) 0.0351(2) 0.00109(18) 0.01784(19) 0.01043(18) 
P 0.01785(18) 0.01704(19) 0.0196(2) -0.00205(14) 0.00383(15) 0.00085(14) 
C11 0.0216(7) 0.0195(8) 0.0211(7) -0.0015(6) 0.0047(6) -0.0026(6) 
C12 0.0239(8) 0.0219(9) 0.0395(10) 0.0077(7) 0.0089(7) 0.0006(6) 
C13 0.0222(8) 0.0327(10) 0.0520(12) 0.0104(9) 0.0109(8) 0.0026(7) 
C14 0.0250(8) 0.0348(10) 0.0400(11) 0.0053(8) 0.0067(8) -0.0079(7) 
C15 0.0355(10) 0.0221(9) 0.0627(13) 0.0078(9) 0.0093(9) -0.0062(8) 
C16 0.0276(9) 0.0193(8) 0.0603(13) 0.0030(8) 0.0090(8) 0.0018(7) 
C21 0.0155(7) 0.0203(8) 0.0248(8) 0.0008(6) 0.0026(6) 0.0002(6) 
C22 0.0316(9) 0.0218(9) 0.0269(8) -0.0012(7) 0.0043(7) 0.0019(7) 
C23 0.0407(10) 0.0224(9) 0.0416(11) -0.0042(8) 0.0060(8) 0.0020(8) 
C24 0.0335(9) 0.0207(9) 0.0566(13) 0.0067(8) 0.0059(9) -0.0021(7) 
C25 0.0322(9) 0.0306(10) 0.0439(11) 0.0133(8) 0.0128(8) -0.0005(8) 
C26 0.0246(8) 0.0273(9) 0.0307(9) 0.0037(7) 0.0102(7) 0.0017(7) 
C31 0.0226(7) 0.0204(8) 0.0221(8) -0.0047(6) 0.0070(6) -0.0025(6) 
C32 0.0245(8) 0.0466(12) 0.0311(10) -0.0127(8) 0.0012(7) 0.0055(8) 
C33 0.0300(9) 0.0602(14) 0.0291(10) -0.0176(9) 0.0000(8) 0.0010(9) 
C34 0.0349(9) 0.0402(11) 0.0316(9) -0.0153(8) 0.0125(8) -0.0043(8) 
C35 0.0311(9) 0.0269(9) 0.0323(9) -0.0034(7) 0.0139(7) 0.0027(7) 
C36 0.0251(8) 0.0235(8) 0.0237(8) 0.0000(6) 0.0054(6) 0.0017(6) 
  
_geom_special_details 
; 
 All esds (except the esd in the dihedral angle between two l.s. planes) 
 are estimated using the full covariance matrix.  The cell esds are taken 
 into account individually in the estimation of esds in distances, angles 
 and torsion angles; correlations between esds in cell parameters are only 
 used when they are defined by crystal symmetry.  An approximate (isotropic) 
 treatment of cell esds is used for estimating esds involving l.s. planes. 
; 
  
loop_ 
 _geom_bond_atom_site_label_1 
 _geom_bond_atom_site_label_2 
 _geom_bond_distance 
 _geom_bond_site_symmetry_2 
 _geom_bond_publ_flag 
Sb Cl1 2.3849(6) . ? 
Sb Cl2 2.5571(5) . ? 
Sb Cl2 2.5572(5) 2 ? 
Sb P 2.7934(4) . ? 
Sb P 2.7934(4) 2 ? 
P C21 1.8082(17) . ? 
P C31 1.8139(16) . ? 
P C11 1.8144(16) . ? 
C11 C12 1.378(2) . ? 
C11 C16 1.390(2) . ? 
C12 C13 1.391(2) . ? 
C13 C14 1.375(3) . ? 
C14 C15 1.380(3) . ? 
C15 C16 1.385(3) . ? 
C21 C26 1.395(2) . ? 
C21 C22 1.398(2) . ? 
C22 C23 1.387(3) . ? 
C23 C24 1.378(3) . ? 
C24 C25 1.378(3) . ? 
C25 C26 1.388(3) . ? 
C31 C36 1.388(2) . ? 
C31 C32 1.395(2) . ? 
C32 C33 1.380(3) . ? 
C33 C34 1.387(3) . ? 
C34 C35 1.375(3) . ? 
C35 C36 1.385(2) . ? 
  
loop_ 
 _geom_angle_atom_site_label_1 
 _geom_angle_atom_site_label_2 
 _geom_angle_atom_site_label_3 
 _geom_angle 
 _geom_angle_site_symmetry_1 
 _geom_angle_site_symmetry_3 
 _geom_angle_publ_flag 
Cl1 Sb Cl2 87.635(11) . . ? 
Cl1 Sb Cl2 87.635(11) . 2 ? 
Cl2 Sb Cl2 175.27(2) . 2 ? 
Cl1 Sb P 85.931(9) . . ? 
Cl2 Sb P 85.936(15) . . ? 
Cl2 Sb P 93.727(15) 2 . ? 
Cl1 Sb P 85.931(9) . 2 ? 
Cl2 Sb P 93.727(15) . 2 ? 
Cl2 Sb P 85.938(15) 2 2 ? 
P Sb P 171.862(17) . 2 ? 
C21 P C31 108.11(7) . . ? 
C21 P C11 107.85(7) . . ? 
C31 P C11 104.32(7) . . ? 
C21 P Sb 97.34(5) . . ? 
C31 P Sb 120.74(5) . . ? 
C11 P Sb 117.46(5) . . ? 
C12 C11 C16 119.33(15) . . ? 
C12 C11 P 123.38(13) . . ? 
C16 C11 P 117.27(12) . . ? 
C11 C12 C13 119.91(16) . . ? 
C14 C13 C12 120.46(17) . . ? 
C13 C14 C15 119.99(17) . . ? 
C14 C15 C16 119.69(18) . . ? 
C15 C16 C11 120.56(17) . . ? 
C26 C21 C22 118.84(16) . . ? 
C26 C21 P 122.74(13) . . ? 
C22 C21 P 118.07(12) . . ? 
C23 C22 C21 120.28(16) . . ? 
C24 C23 C22 120.23(18) . . ? 
C25 C24 C23 120.08(18) . . ? 
C24 C25 C26 120.37(18) . . ? 
C25 C26 C21 120.20(17) . . ? 
C36 C31 C32 119.58(15) . . ? 
C36 C31 P 119.42(12) . . ? 
C32 C31 P 120.97(13) . . ? 
C33 C32 C31 120.15(17) . . ? 
C32 C33 C34 119.86(18) . . ? 
C35 C34 C33 120.19(17) . . ? 
C34 C35 C36 120.39(16) . . ? 
C35 C36 C31 119.80(16) . . ? 
  
loop_ 
 _geom_torsion_atom_site_label_1 
 _geom_torsion_atom_site_label_2 
 _geom_torsion_atom_site_label_3 
 _geom_torsion_atom_site_label_4 
 _geom_torsion 
 _geom_torsion_site_symmetry_1 
 _geom_torsion_site_symmetry_2 
 _geom_torsion_site_symmetry_3 
 _geom_torsion_site_symmetry_4 
 _geom_torsion_publ_flag 
Cl1 Sb P C21 173.77(5) . . . . ? 
Cl2 Sb P C21 -98.31(5) . . . . ? 
Cl2 Sb P C21 86.42(5) 2 . . . ? 
P Sb P C21 173.78(5) 2 . . . ? 
Cl1 Sb P C31 57.59(6) . . . . ? 
Cl2 Sb P C31 145.50(6) . . . . ? 
Cl2 Sb P C31 -29.77(6) 2 . . . ? 
P Sb P C31 57.60(6) 2 . . . ? 
Cl1 Sb P C11 -71.70(6) . . . . ? 
Cl2 Sb P C11 16.22(6) . . . . ? 
Cl2 Sb P C11 -159.05(6) 2 . . . ? 
P Sb P C11 -71.69(6) 2 . . . ? 
C21 P C11 C12 1.08(17) . . . . ? 
C31 P C11 C12 115.87(15) . . . . ? 
Sb P C11 C12 -107.49(14) . . . . ? 
C21 P C11 C16 179.52(14) . . . . ? 
C31 P C11 C16 -65.69(15) . . . . ? 
Sb P C11 C16 70.95(15) . . . . ? 
C16 C11 C12 C13 1.9(3) . . . . ? 
P C11 C12 C13 -179.70(15) . . . . ? 
C11 C12 C13 C14 0.3(3) . . . . ? 
C12 C13 C14 C15 -1.9(3) . . . . ? 
C13 C14 C15 C16 1.2(3) . . . . ? 
C14 C15 C16 C11 1.0(3) . . . . ? 
C12 C11 C16 C15 -2.6(3) . . . . ? 
P C11 C16 C15 178.92(16) . . . . ? 
C31 P C21 C26 6.97(15) . . . . ? 
C11 P C21 C26 119.22(13) . . . . ? 
Sb P C21 C26 -118.78(13) . . . . ? 
C31 P C21 C22 -179.92(12) . . . . ? 
C11 P C21 C22 -67.67(14) . . . . ? 
Sb P C21 C22 54.33(12) . . . . ? 
C26 C21 C22 C23 -0.9(2) . . . . ? 
P C21 C22 C23 -174.34(13) . . . . ? 
C21 C22 C23 C24 0.9(3) . . . . ? 
C22 C23 C24 C25 -0.2(3) . . . . ? 
C23 C24 C25 C26 -0.5(3) . . . . ? 
C24 C25 C26 C21 0.5(3) . . . . ? 
C22 C21 C26 C25 0.2(2) . . . . ? 
P C21 C26 C25 173.28(13) . . . . ? 
C21 P C31 C36 -119.04(13) . . . . ? 
C11 P C31 C36 126.36(13) . . . . ? 
Sb P C31 C36 -8.50(16) . . . . ? 
C21 P C31 C32 62.85(16) . . . . ? 
C11 P C31 C32 -51.75(17) . . . . ? 
Sb P C31 C32 173.39(13) . . . . ? 
C36 C31 C32 C33 1.3(3) . . . . ? 
P C31 C32 C33 179.45(16) . . . . ? 
C31 C32 C33 C34 -1.5(3) . . . . ? 
C32 C33 C34 C35 0.2(3) . . . . ? 
C33 C34 C35 C36 1.3(3) . . . . ? 
C34 C35 C36 C31 -1.5(3) . . . . ? 
C32 C31 C36 C35 0.1(3) . . . . ? 
P C31 C36 C35 -177.99(13) . . . . ? 
  
_diffrn_measured_fraction_theta_max    0.999 
_diffrn_reflns_theta_full              27.51 
_diffrn_measured_fraction_theta_full   0.999 
_refine_diff_density_max    0.334 
_refine_diff_density_min   -0.634 
_refine_diff_density_rms    0.056 
